# Supplementary figures and images for: A pain-mediated neural signal induces relapse in murine autoimmune encephalomyelitis, a multiple sclerosis model
Source: eLife journal article supplement (doi:10.7554/elife.08733), 2015-07-20

Figure 1-figure supplement 1

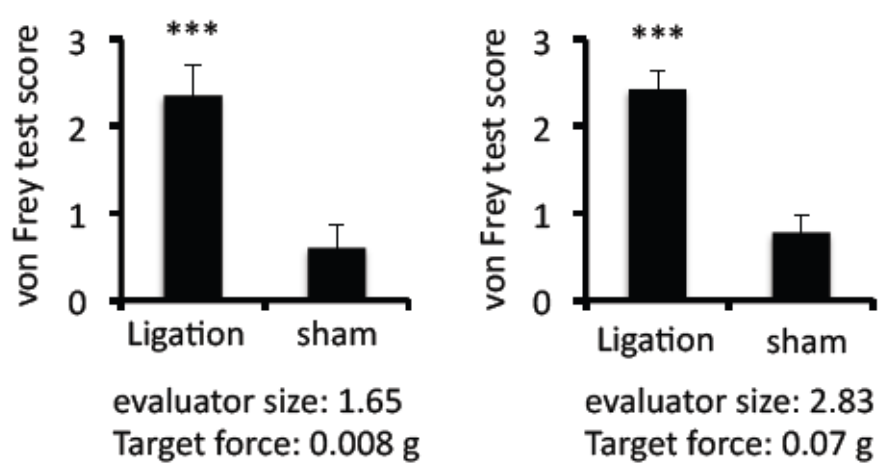

Supplement: supp [file elife_poa_e08733_Figure_1_figure_supplement_1.pdf › elife_poa_e08733_Figure_1_figure_supplement_1.pdf]

Figure 1-figure supplement 2

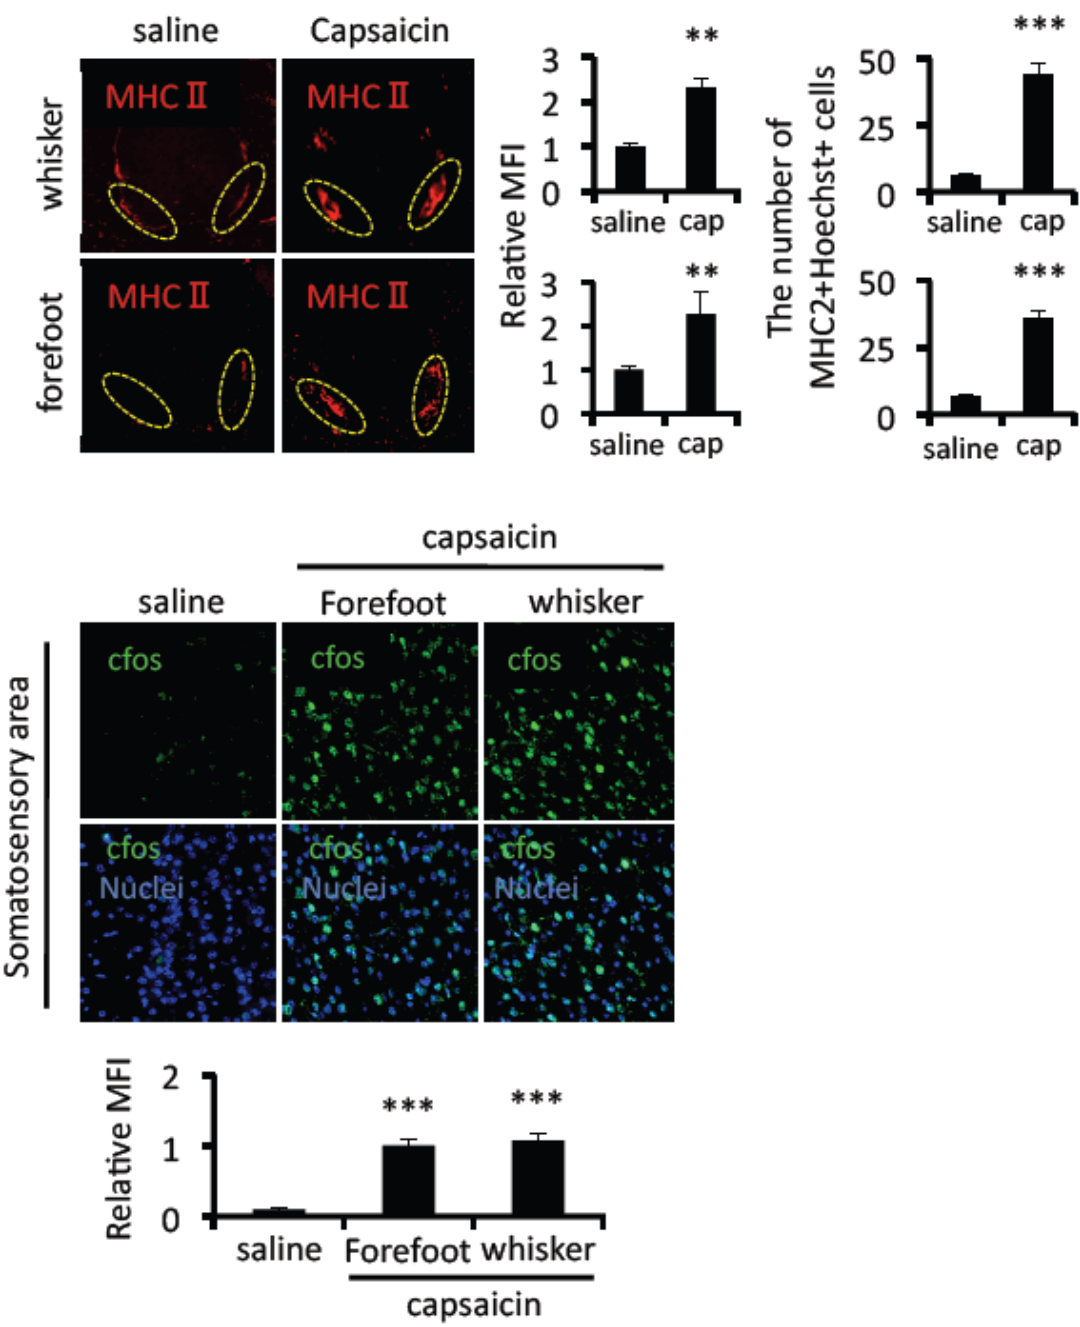

Supplement: supp [file elife_poa_e08733_Figure_1_figure_supplement_2.pdf › elife_poa_e08733_Figure_1_figure_supplement_2.pdf]

Figure 2-figure supplement 1

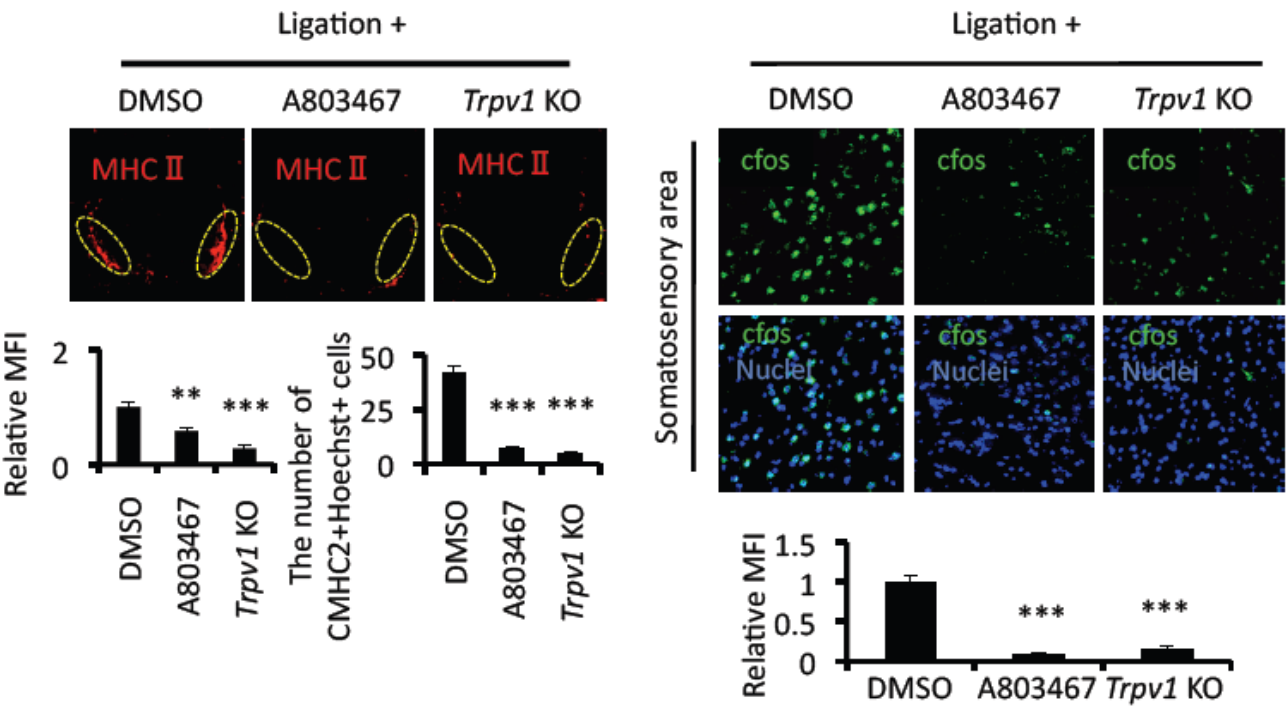

Supplement: supp [file elife_poa_e08733_Figure_2_figure_supplement_1.pdf › elife_poa_e08733_Figure_2_figure_supplement_1.pdf]

Figure 2-figure supplement 2

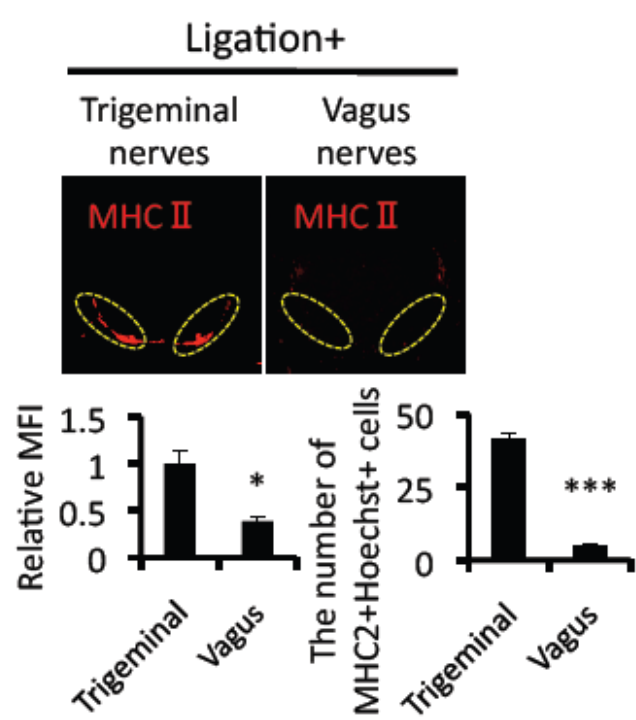

Supplement: supp [file elife_poa_e08733_Figure_2_figure_supplement_2.pdf › elife_poa_e08733_Figure_2_figure_supplement_2.pdf]

Figure 3-figure supplement 1

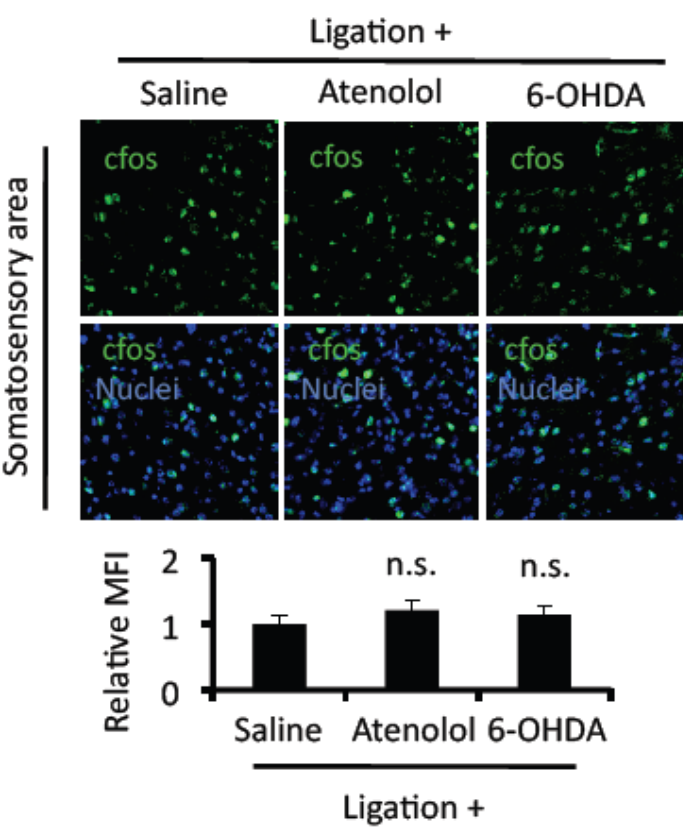

Supplement: supp [file elife_poa_e08733_Figure_3_figure_supplement_1.pdf › elife_poa_e08733_Figure_3_figure_supplement_1.pdf]

Figure 5-figure supplement 1

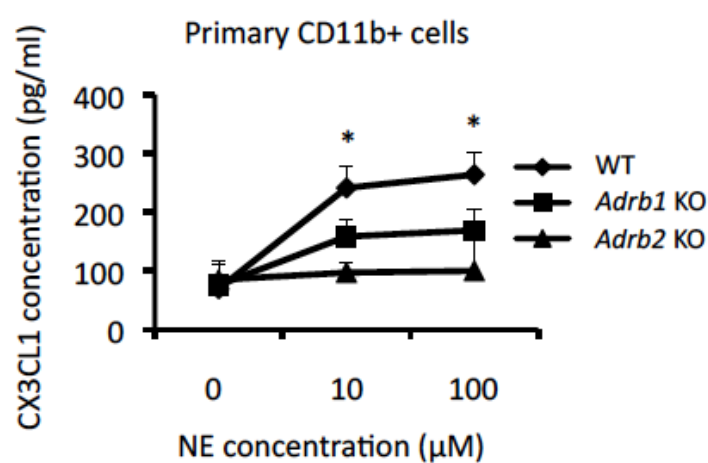

Supplement: supp [file elife_poa_e08733_Figure_5_figure_supplement_1.pdf › elife_poa_e08733_Figure_5_figure_supplement_1.pdf]

Figure 6-figure supplement 1

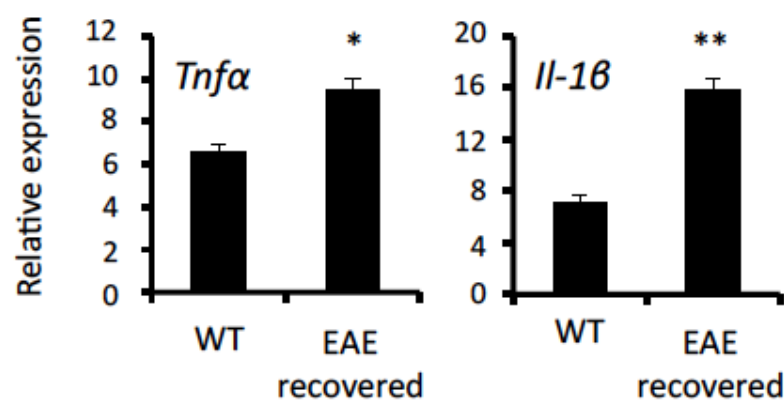

Supplement: supp [file elife_poa_e08733_Figure_6_figure_supplement_1.pdf › elife_poa_e08733_Figure_6_figure_supplement_1.pdf]
